# Supplementary material
Source: PubMed Central journal article supplement (PMC4764085)

**Dimerization or oligomerization of the actin-like FtsA protein enhances the integrity of the cytokinetic Z ring**

Daisuke Shiomi and William Margolin\*

*Microbiology and Molecular Genetics, University of Texas Medical School,  
6431 Fannin Houston, TX 77030*

\*Corresponding author.

Mailing address: Microbiology and Molecular Genetics, University of Texas Medical  
School, 6431 Fannin Houston, TX 77030

Phone: 713-500-5452

FAX: 713-500-5499

E-mail: [William.Margolin@uth.tmc.edu](mailto:William.Margolin@uth.tmc.edu)

**Supplementary Materials**

## SUPPLEMENTARY TABLE AND LEGENDS TO SUPPLEMENTARY FIGURES

**Table S1.** Oligonucleotides used in this study.

| Oligonucleotide number and name | Sequence                                            |
|---------------------------------|-----------------------------------------------------|
| 822. ftsA XbaI FP               | tat ata tct aga atg atc aag gcg acg gac aga         |
| 823. ftsA Stop PstI RP          | tat ata ctg cag tta aaa ctc ttt tgc cag cca         |
| 826. ftsA SacI FP               | tat ata gag ctc atg atc aag gcg acg gac aga         |
| 827. ftsA non stop XbaI RP      | tat ata tct aga aaa ctc ttt tgc cag cca act         |
| 906. ftsA-M71A-f2               | cat tga cca ggc aga att gGC Cgc aga ttg tca gat ctc |
| 907. ftsA-M71A-r2               | gag atc tga caa tct gcG GCc aat tct gcc tgg tca atg |
| 951. ftsA-R286W-f               | ggt cgt ccg cca TGG agt ctg caa cgt c               |
| 952. ftsA-R286W-r               | gac gtt gca gac tCC Atg gcg gac gac c               |
| 1100. ftsA-R300E-f              | gtg atc gag ccg GAG tat acc gag ctg                 |
| 1101. ftsA-R300E-r              | cag ctc ggt ata CTC cgg ctc gat cac                 |
| 989. ftsA-d126-133-f            | gtg cgc gat gag cat gag tat gcg att gac             |
| 990. ftsA-d126-133-r            | gtc aat cgc ata ctc atg ctc atc gcg cac             |
| 1003. ftsA-I143L-f              | cta tca gga agg gCT Caa gaa tcc ggt agg ac          |
| 1004. ftsA-I143L-r              | gtc cta ccg gat tct tGA Gcc ctt cct gat ag          |
| 1029. ftsA-D66X-f               | caa cgc gcc att NNN cag gca gaa ttg                 |
| 1030. ftsA-D66X-r               | caa ttc tgc ctg NNN aat ggc gcg ttg                 |
| 1031. ftsA-Q67X-f               | gcc att gac NNN gca gaa ttg                         |
| 1032. ftsA-Q67X-r               | caa ttc tgc NNN gtc aat ggc                         |
| 1033. ftsA-E69X-f               | gac cag gca NNN ttg atg gca gat tg                  |
| 1034. ftsA-E69X-r               | caa tct gcc atc aaN NNt gcc tgg tc                  |
| 1035. ftsA-M71X-f               | cat tga cca ggc aga att gNN Ngc aga ttg tca gat ctc |
| 1036. ftsA-M71X-r               | gag atc tga caa tct gcN NNc aat tct gcc tgg tca atg |
| 918. FLAG-f (NdeI)              | gga att cca tat gga cta caa gga cga cga tga caa a   |
| 528. ftsAC-term (XhoI)          | ttt ctc gag tta aaa ctc ttt tgc c                   |
| 696. pDSW-reverse               | caa att ctg ttt tat cag ac                          |
| 971. zipA-f (NdeI)              | cgc cat atg atg cag gat ttg cgt ctg                 |
| 972. zipA-r (BamHI)             | gcg gat cct cag gcg ttg gcg tct ttg                 |
| 973. zapA-f (NdeI)              | cgc cat atg tct gca caa ccc gtc gat atc c           |
| 974. zapA-r (BamHI)             | gcg gat cct cat tca aag ttt tgg tta g               |
| 975. gfp-f (NsiI)               | cca atg cat aaa gga gaa gaa ctt ttc ac              |
| 977. ftsN-r (XhoI)              | ccc tgc agt caa ccc ccg gcg gcg                     |
| 965. ftsZ-f (PstI)              | gcc tgc agg gtt tga acc aat gga act tac c           |
| 967. ftsZ-r (XhoI)              | ccc tgc agt taa tca gct tgc tta cgc agg aat gc      |
| 650. ftsA1PKT25                 | aaa act gca ggg atg atc aag gcg acg                 |
| 968. ftsA-f (PstI)              | gcc ctg cag cat caa ggc gac gga cag aaa act gg      |
| 876. ftsA-r9 (EcoRI)            | cgg aat tct taa aac tct ttt cgc agc c               |
| 646. ftsZ1-pKT25                | aaa act gca gcg atg ttt gaa cca atg                 |
| 647. ftsZ2-pKT25                | cgc gga tcc tta atc agc ttg att a                   |

## Supplementary Figure legends

**Fig. S1. Localization of GFP-FtsAs.** WM1115 (*ftsA12*) cells carrying pWM3196 (GFP-FtsA), pWM3197 (GFP-FtsA-M71A) or pWM3200 (GFP-FtsA-E69P) were incubated at 30°C for 2 h in the presence of 0.75  $\mu$ M sodium salicylate (left panels), then shifted to 42°C for 30 min (right panels). Scale bar is 10  $\mu$ m.

**Fig. S2 Relocalization of GFP-FtsN to cell poles by FtsA derivatives fused to DivIVA.** (A) Localization of GFP-FtsN in WM1074 cells carrying pWM1806 (DivIVA-FtsA), pWM3070 (DivIVA-FtsA-M71A), pWM3071 (DivIVA-FtsA- $\Delta$ 1C), or pWM3072 (DivIVA-FtsA-E69P) in the absence and presence of 0.2% arabinose. (B) Immunoblot of representative cells used for microscopic experiments, probed with anti-DivIVA antibody.

**Fig. S3. Toxicity of overproduced monomeric or tandem dimer fusions of FtsA in WT cells.** (A) Toxicity of overproduced FtsA derivatives is shown by colony viabilities of WM1074 carrying pWM2780 (vector), pWM2669 (FtsA), pWM2671 (FtsA-M71A), or pWM3055 (FtsA-E69P) in the presence of the indicated concentrations of IPTG. (B) Toxicity of overproduced tandem FtsA dimer derivatives is shown by colony viabilities of WM1074 carrying pWM2780 (vector), pWM2669 (FtsA), pWM3079 (AA), pWM3082 (71-71), or pWM3085 (69-69) in the presence of the indicated concentrations of IPTG.

**Fig. S4. Sequence alignment of alpha-helix H1 of FtsA from different species.** Conserved Glu69 and Met71 are shown in bold.

**Fig. S5. Complementation of an FtsA depletion strain (WM1281) by FtsA derivatives.**

WM1281 containing plasmids producing FtsA (pWM2669), FtsA-M71A (pWM2671), FtsA\* (pWM2781), or FtsAA (pWM3079) were grown at 30°C for 4 h in the absence of IPTG prior to spotting on plates in the presence of the indicated concentrations of IPTG, which were then incubated overnight at 42°C.

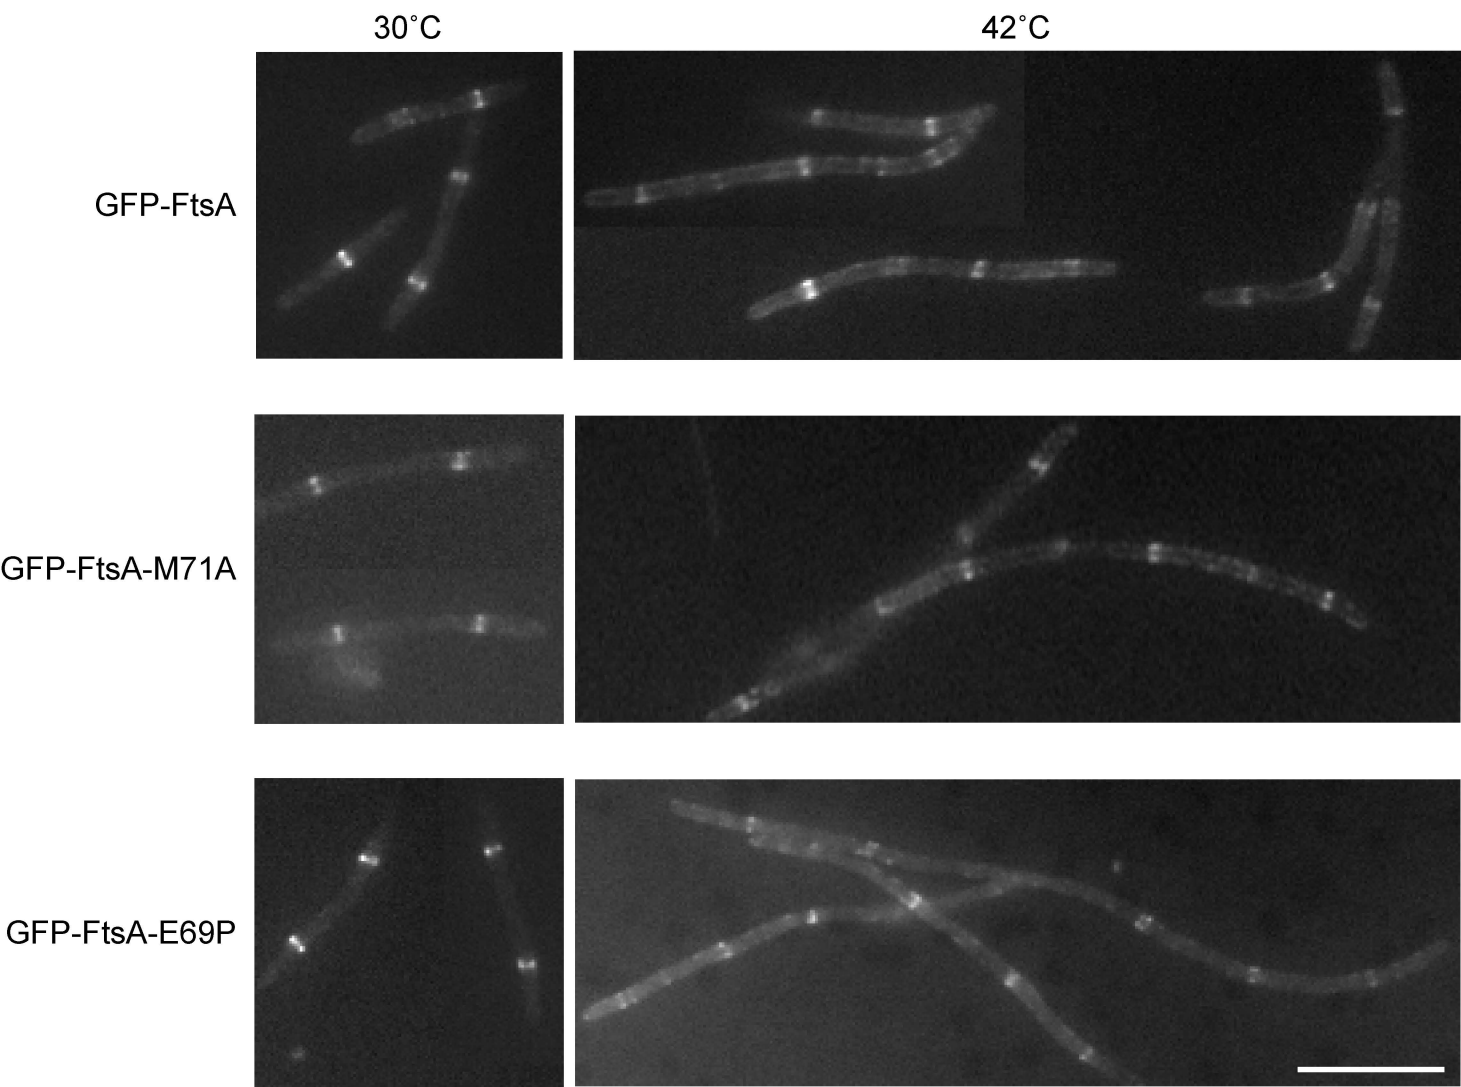



**A**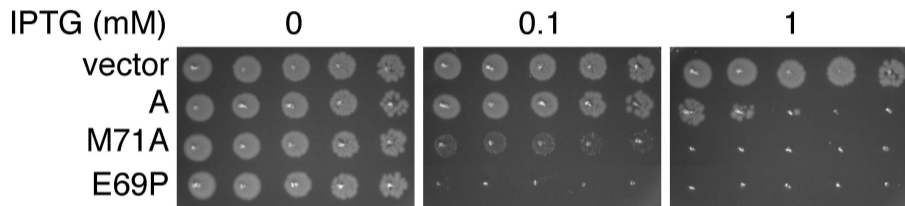**B**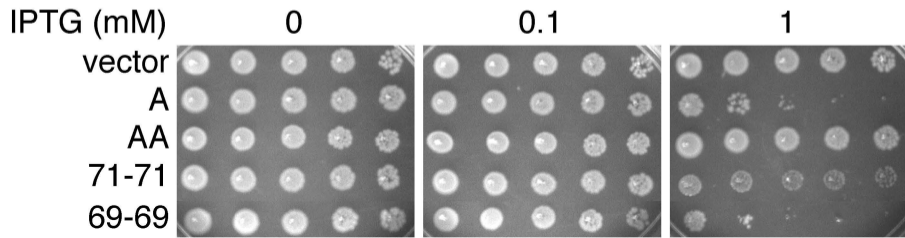

|                           |                              |    |
|---------------------------|------------------------------|----|
| <i>E. coli</i>            | LESVVKCVQRAIDQAE <b>ELMA</b> | 72 |
| <i>D. radiodurans</i>     | LERATQAIKQSLHAA <b>ERVS</b>  | 69 |
| <i>N. meningitidis</i>    | IDATVQAIRQAVNDA <b>ELMA</b>  | 65 |
| <i>B. mallei</i>          | IEATVQSIQRALEEA <b>ELMA</b>  | 71 |
| <i>M. capsulatus</i>      | LETTVHSIQRAVEEA <b>ELMA</b>  | 72 |
| <i>X. campestris</i>      | IESTVQSIQRAVEEA <b>ELMA</b>  | 72 |
| <i>B. bacteriovorus</i>   | IEATTD <b>SIRKAKEEEAELMS</b> | 63 |
| <i>C. psychrerythraea</i> | LNLVIQAIQRRAINEA <b>ELMA</b> | 72 |
| <i>B. burgdorferi</i>     | IEAALDSISNSIEAA <b>ELIS</b>  | 68 |
| <i>P. multocida</i>       | LNAVVT <b>SVQRAIELAESVA</b>  | 72 |
| <i>H. influenzae</i>      | LDAVVGSIQRAIEAA <b>ESMA</b>  | 72 |
| <i>I. loihiensis</i>      | LNLVVQSVQRAVDEA <b>ELMA</b>  | 64 |
| <i>L. lactis</i>          | IEKVAQALRKAVNAA <b>EERA</b>  | 68 |
| <i>E. faecium</i>         | IDKTVQAIQRAVRQA <b>EEKA</b>  | 68 |
| <i>B. subtilis</i>        | IDETVHSIRKAFDQA <b>ERMV</b>  | 68 |
| <i>C. jejuni</i>          | IELASKSIEEAVRSA <b>EMMS</b>  | 62 |
| <i>F. johnsoniae</i>      | ITQTIQSIQQAIL <b>EENNS</b>   | 69 |
| <i>R. typhi</i>           | LKNAETSILTAIYAL <b>EKDC</b>  | 63 |
| <i>C. crescentus</i>      | LDEAAQAIQAVERA <b>ETVA</b>   | 66 |
| <i>Z. mobilis</i>         | MESTEKAVREAVEQA <b>ERIA</b>  | 71 |
| <i>P. gingivalis</i>      | IDEAAAIIRRVNQLNENL           | 71 |
| <i>P. putida</i>          | IESTVQSIQRAVEEA <b>QLMA</b>  | 65 |
| <i>C. tetani</i>          | IDETSEGIKTSIYQLQ <b>TMI</b>  | 64 |
| <i>H. hepaticus</i>       | IELASLAI <b>RNSVND</b> AKRVA | 68 |
| <i>R. sphaeroides</i>     | MNETERA <b>IRTAVQAAQ</b> KMA | 90 |
| <i>S. aureus</i>          | FDIARQAIKDTIKK <b>ASIAS</b>  | 63 |
| <i>T. maritima</i>        | AIAFKESVNTLLKE <b>EEQL</b>   | 71 |



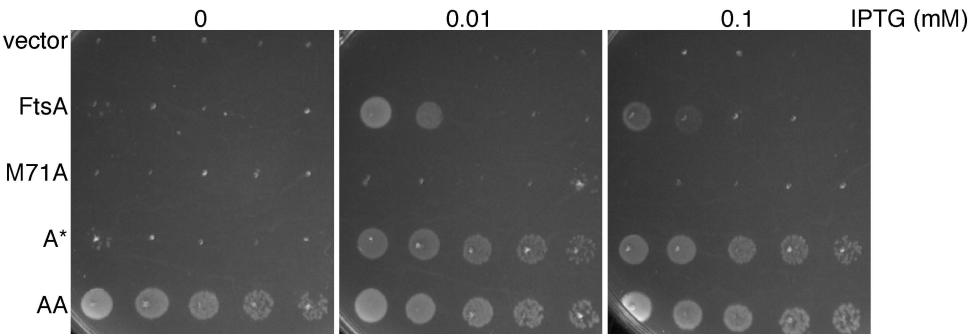

Supplement: NIHMS440580-supplement-supplemental_materials.pdf [file NIHMS440580-supplement-supplemental_materials.pdf]
